# Supplementary material for: Resolving stepping rotation in Thermus thermophilus H+-ATPase/synthase with an essentially drag-free probe
Source: PubMed Central journal article supplement — Nat Commun. 2011 Mar 8;2:233–. doi: 10.1038/ncomms1215 (PMC3072102; doi:10.1038/ncomms1215), 2011-03-08
Supplement: ncomms1215-s1.pdf [file ncomms1215-s1.pdf]

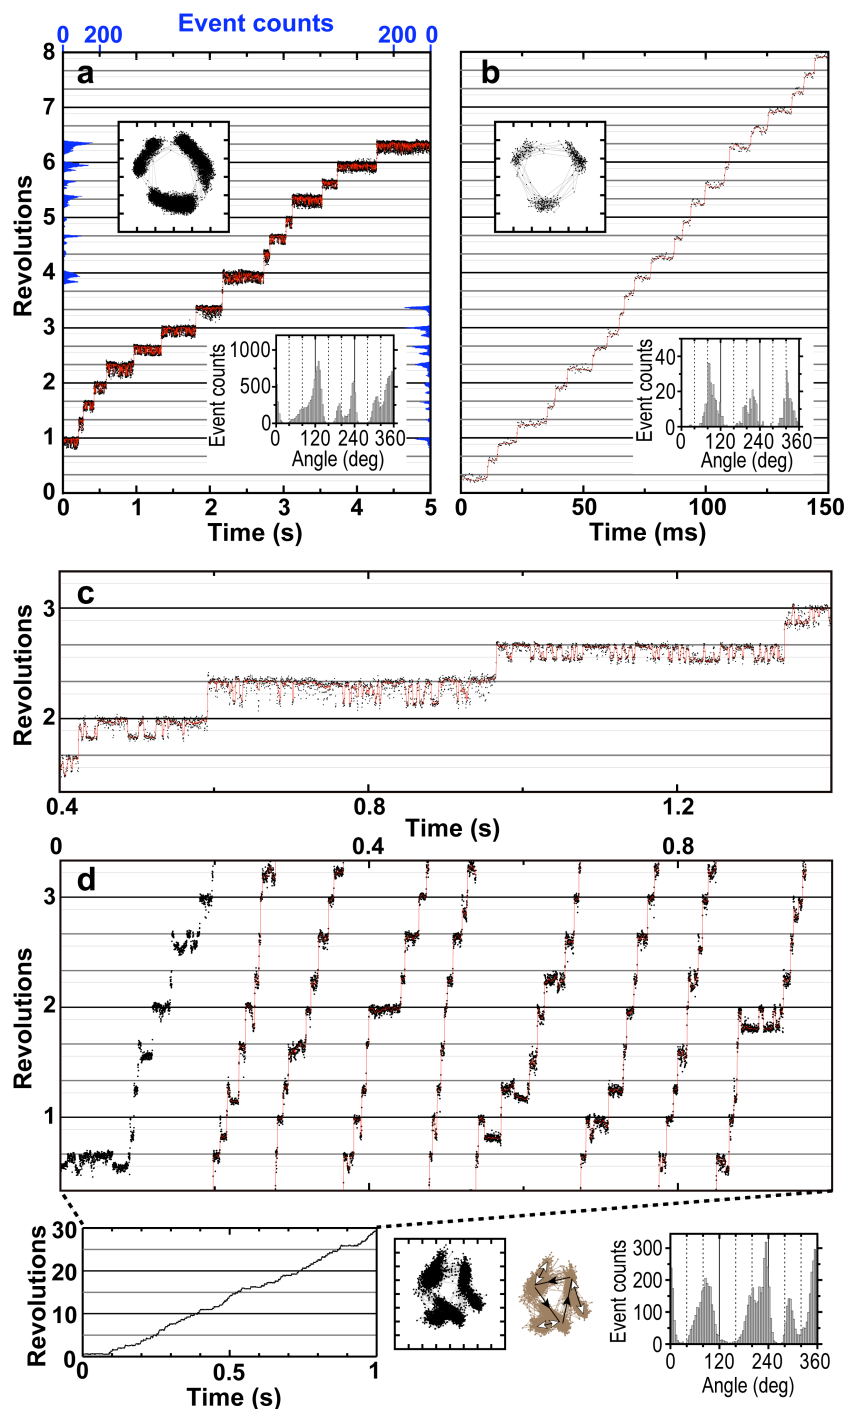

**Supplementary Figure S1. A typical example of  $\sim 40^\circ$  jumps observed in some  $V_1$  molecules.** (a and b) Rotation of a same  $V_1$  molecule was observed first at 4  $\mu$ M ATP (a) and then after infusion of 1 mM ATP (b). Images were captured at 4000 frames  $s^{-1}$ (fps), and red lines on the time courses are median-filtered over 11 points (2.5 ms). Upper insets, trajectories of the bead centroid, axis divisions being 11.1 nm. Lower insets, histograms of angular positions for the indicated portion of the records. In a, histograms along the time courses (horizontal projection of the time courses onto the vertical axes) are also shown as blue bars. (c) An expanded view of a between 0.4 and 1.4 s. Such peculiar fluctuations, jumping to and fro between two angular positions separated by  $\sim 40^\circ$ , were observed in less than 1/3 of rotating beads (see Supplementary Table S1). The intervals between the jumps were of the order of 10 ms, apparently independent of [ATP] and not synchronous with the  $120^\circ$  stepping (c). These relatively infrequent jumps were difficult to discern directly at mM ATP where the basic  $120^\circ$  steps occur at  $\sim 5$  ms intervals, but their presence could be inferred from the random shift of dwelling positions by  $\sim 40^\circ$  (b). (d) Another example at 400  $\mu$ M ATP, showing a similar jump frequency but in off-circular directions. Images were captured at 8000 fps, and red lines on the time courses are median-filtered over 21 points (2.5 ms). Lower panels from left to right show: 1) the entire time course from which the expansion in the upper panel is made; 2) bead trajectory, axis divisions 11.1 nm; 3) movements in the trajectory where black arrows show normal anticlockwise stepping and white arrows off-circular jumps; 4) histogram of angular positions for the indicated portion of the records.

The cause of these jumps is yet unknown. If these are coupled with catalysis, candidates would be hydrolysis/resynthesis of ATP or release/rebinding of ADP within a catalytic pocket, because the jumps did not cease at [ATP] as low as 1  $\mu$ M. A more likely explanation, in view of the [ATP] independence, asynchrony with  $120^\circ$  stepping, and deviation from circular trajectory as in the case of d, is that the bead can adopt two orientations relative to the D subunit (or the D subunit or its part relative to the rest of  $V_1$ ) and thermally jumps between the two positions.

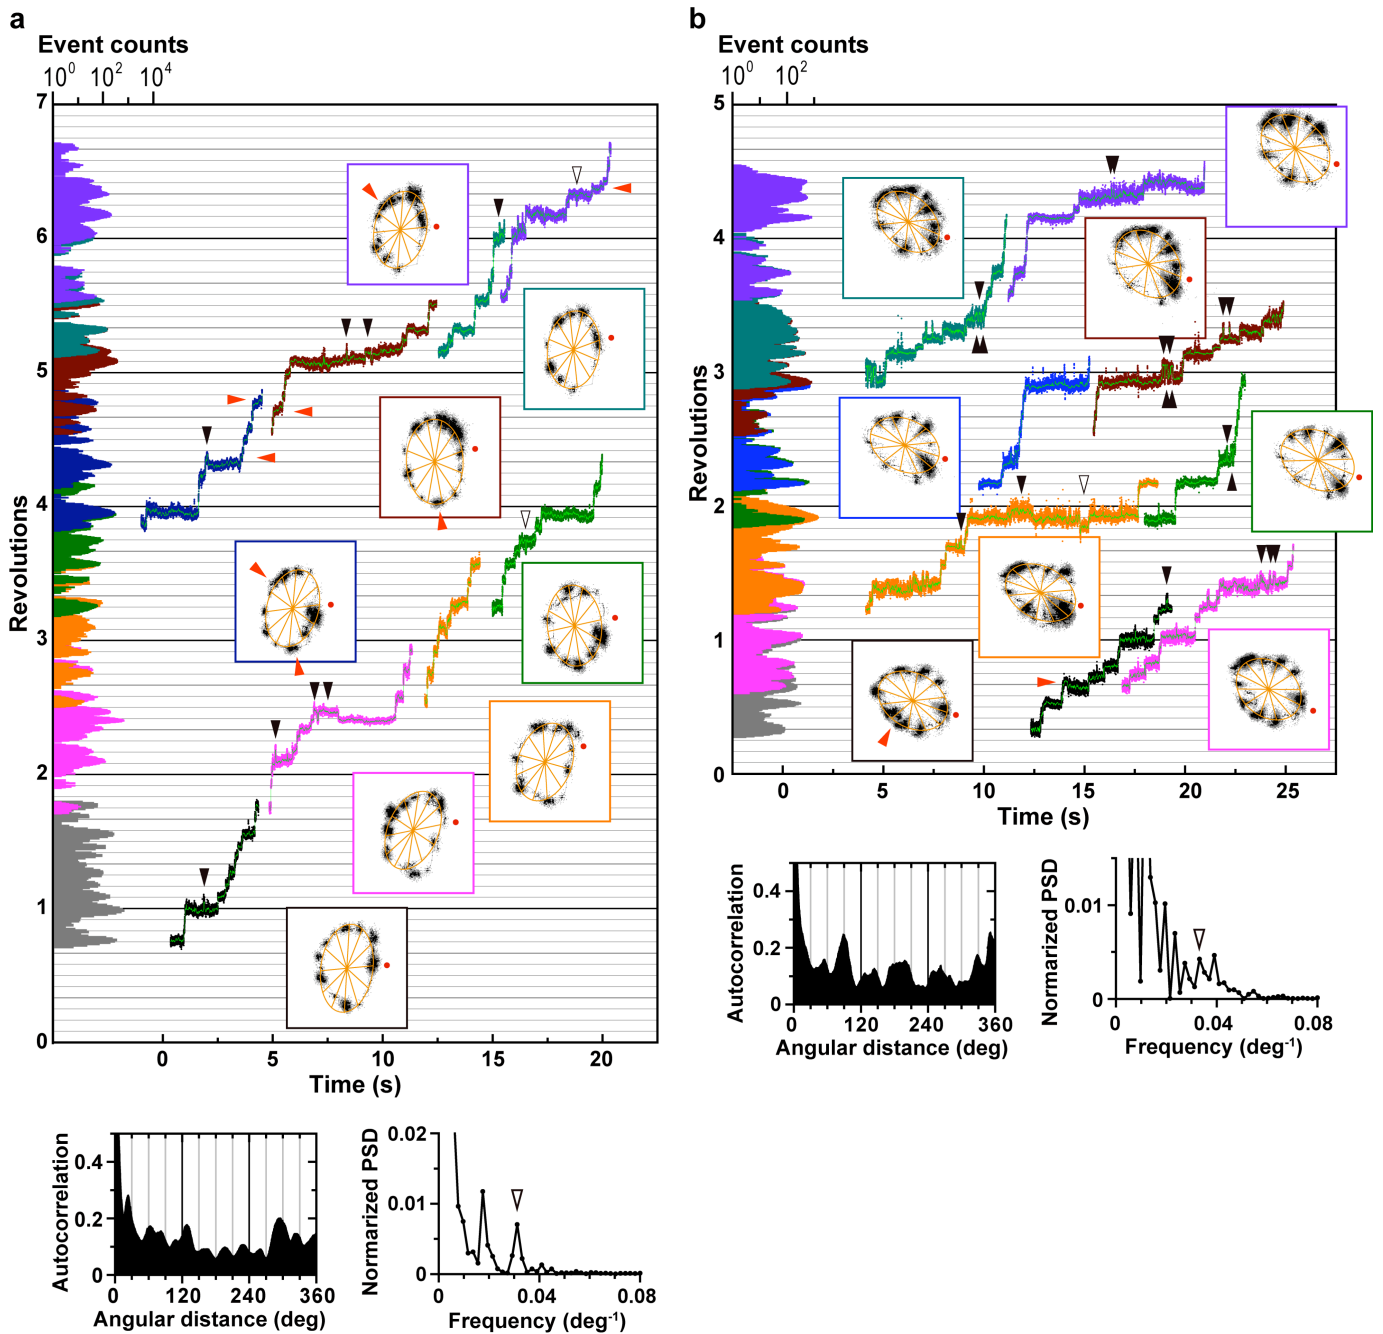

**Supplementary Figure S2. Additional examples of  $\sim 30^\circ$  substep rotation in upside down  $V_0V_1$ .** Rotation was observed at 2000 fps at  $40 \mu\text{M}$  ATP in the presence of 0.1 % (w/v) Triton X-100. See Fig. 4 for details. Drifts in these data were larger than in Fig. 4, and thus the coloured portions are chosen with mutual overlaps. Boxes enclosing trajectories measure  $66 \times 66 \text{ nm}^2$ . Histogram bin size is  $1^\circ$  in **a**, and  $2^\circ$  in **b**. Lower left panels show the autocorrelation of its angular histogram; the continuous time courses over  $1750^\circ$  were 21-point median filtered and then binned at  $0.25^\circ$  intervals without the correction for rotational drift. Lower right panels show the power spectra, the *arrowheads* indicating a peak at  $(32^\circ)^{-1}$  in **a**, and  $(30^\circ)^{-1}$  in **b**, respectively.

**Supplementary Table S1. Statics of  $V_1$  and  $V_0V_1$  rotations in Fig. 1.**

**$V_1$  rotations.**

| [ATP]             | $n$        | rotation rate (rps) |           | total # of revolutions |         | back&forth jumps per 10 dwells <sup>*1</sup> |                   |                  |                  |
|-------------------|------------|---------------------|-----------|------------------------|---------|----------------------------------------------|-------------------|------------------|------------------|
|                   |            | mean $\pm$ SD       | range     | mean $\pm$ SD          | range   | <1                                           | 1-5               | >5               | N.D.             |
| 4 mM              | 12         | 58 $\pm$ 9          | 44-72     | 291 $\pm$ 166          | 85-600  | 2                                            |                   |                  |                  |
| 4 mM (+DDM)       | 6          | 51 $\pm$ 4          | 44-54     | 357 $\pm$ 194          | 170-650 |                                              |                   |                  |                  |
| 2 mM              | 20         | 58 $\pm$ 8          | 43-74     | 297 $\pm$ 155          | 44-678  | 2                                            |                   |                  |                  |
| 1 mM              | 8          | 53 $\pm$ 9          | 41-61     | 345 $\pm$ 326          | 28-750  | 1                                            |                   |                  |                  |
| 400 $\mu$ M       | 12         | 40 $\pm$ 9          | 26-51     | 367 $\pm$ 172          | 134-660 | 2                                            | 2                 |                  | 1                |
| 200 $\mu$ M       | 8          | 31 $\pm$ 6          | 23-38     | 264 $\pm$ 132          | 50-434  | 2                                            | 1                 |                  |                  |
| 100 $\mu$ M       | 27         | 19 $\pm$ 7          | 11-40     | 125 $\pm$ 74.6         | 32-364  | 5                                            | 2                 |                  | 1                |
| 40 $\mu$ M        | 15         | 7.9 $\pm$ 2.5       | 4.7-13    | 126 $\pm$ 61.7         | 20-211  | 5                                            | 1                 |                  | 1                |
| 40 $\mu$ M (+DDM) | 4          | 10 $\pm$ 2          | 7.2-12    | 279 $\pm$ 260          | 22-584  |                                              | 1                 |                  |                  |
| 10 $\mu$ M        | 17         | 1.9 $\pm$ 0.4       | 1.1-2.6   | 56.9 $\pm$ 41.5        | 15-160  | 4                                            | 2                 |                  |                  |
| 4 $\mu$ M         | 18         | 1.3 $\pm$ 0.8       | 0.74-2.9  | 64.3 $\pm$ 55.0        | 21-220  | 3                                            | 1                 | 3                | 1                |
| 2 $\mu$ M         | 10         | 0.80 $\pm$ 0.22     | 0.48-1.2  | 77.1 $\pm$ 68.6        | 10-196  | 3                                            | 1                 | 1                |                  |
| 1 $\mu$ M         | 12         | 0.24 $\pm$ 0.11     | 0.11-0.47 | 35.5 $\pm$ 26.0        | 10-105  | 3                                            | 3                 | 2                | 1                |
| total # (ratio)   | <b>169</b> | -                   | -         | -                      | -       | <b>32</b><br>(19%)                           | <b>14</b><br>(8%) | <b>6</b><br>(4%) | <b>5</b><br>(3%) |

**$V_0V_1$  rotations**

| [ATP]                | $n$ | rotation rate (rps) |             | total # of revolutions |        |
|----------------------|-----|---------------------|-------------|------------------------|--------|
|                      |     | mean $\pm$ SD       | range       | mean $\pm$ SD          | range  |
| 4 mM (Small steps)   | 12  | 2.9 $\pm$ 4.7       | 0.46-16     | 102 $\pm$ 195          | 20-720 |
| 4 mM (Clean 3-steps) | 3   | 23 $\pm$ 14         | 6.3-33      | 232 $\pm$ 319          | 26-600 |
| 400 $\mu$ M          | 6   | 0.57 $\pm$ 0.27     | 0.11-0.90   | 25.5 $\pm$ 9.2         | 16-40  |
| 40 $\mu$ M           | 6   | 0.83 $\pm$ 0.65     | 0.23-1.7    | 36.5 $\pm$ 27.4        | 16-90  |
| 4 $\mu$ M            | 8   | 0.20 $\pm$ 0.07     | 0.071-0.31  | 17.0 $\pm$ 4.3         | 9-22   |
| 0.4 $\mu$ M          | 4   | 0.038 $\pm$ 0.11    | 0.030-0.047 | 8.3 $\pm$ 1.7          | 6-10   |

<sup>\*1</sup>Occurrence of  $\sim 40^\circ$  back and forth fluctuations. Dwells containing one or more return jumps were counted. <1, marginal cases where less than one dwell in 10 showed jumps. N.D., not determined because the dwells were too noisy. In Fig. S1, **a** is judged as >5, **b** as <1, and **d** as 1-5.
